# Supplementary material
Source: PubMed Central journal article supplement (PMC2769050)
Supplement: mol.109.058057_1.pdf [file mol.109.058057_1.pdf]

Parallel functional activity profiling reveals valvulopathogens are potent 5-HT<sub>2B</sub> receptor agonists: implications for drug safety assessment

Xi-Ping Huang, Vincent Setola, Prem N. Yadav, John A. Allen, Sarah C. Rogan, Bonnie J. Hanson, Chetana Revankar, Matt Robers, Chris Doucette, and Bryan L. Roth

Molecular Pharmacology

Supplemental Table 3

| <b>Cell Line</b>                | <b><math>pK_D \pm SE</math><br/>(<math>K_D</math>, nM)</b> | <b><math>B_{max} \pm SE</math><br/>(fmol/mg)</b> |
|---------------------------------|------------------------------------------------------------|--------------------------------------------------|
| FlpIn HEK293 5-HT <sub>2B</sub> | 8.16 ± 0.06<br>(6.9)                                       | 904 ± 89                                         |
| GeneBlazer 5-HT <sub>2B</sub>   | 7.94 ± 0.05<br>(11)                                        | 902 ± 83                                         |
| Tango 5-HT <sub>2B</sub>        | 8.00 ± 0.05<br>(10)                                        | 1173 ± 108                                       |
| ERK2 5-HT <sub>2B</sub>         | 7.97 ± 0.08<br>(11)                                        | 761 ± 115                                        |
